# Supplementary material for: Monitoring the Interfacial Polymerization of Piperazine and Trimesoyl Chloride with Hydrophilic Interlayer or Macromolecular Additive by in-situ FT-IR Spectroscopy
Source: Preprints.org preprint supplement (doi:10.20944/preprints201911.0012.v2), 2019-11-06
Supplement: Supplementary file 1 [file supplementary]

# Electronic Supporting Information

## Monitoring the Interfacial Polymerization of Piperazine and Trimesoyl Chloride with Hydrophilic Interlayer or Macromolecular Additive by in-situ FT-IR Spectroscopy

Xi Yang<sup>1\*</sup>

<sup>1</sup> Department of Polymer Science & Engineering, Zhejiang University, China; xkyang@zju.edu.cn

\* Correspondence: xkyang@zju.edu.cn; Tel.: +86-187-5810-1644

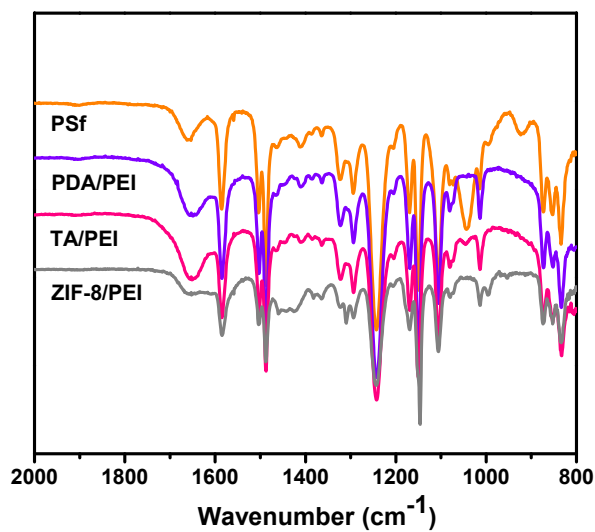

**Figure S1.** ATR/FT-IR spectra of PSf substrate and PSf substrates modified with PDA/PEI, TA/PEI and ZIF-8/PEI interlayers, respectively.

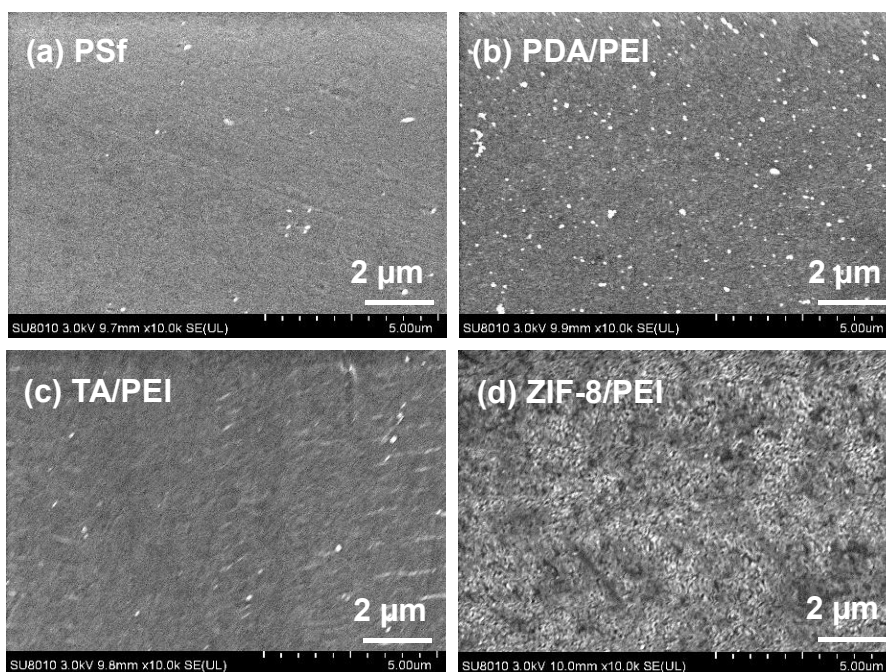

**Figure S2.** Surface morphologies observed by FESEM images of PSf substrate and PSf substrates modified with PDA/PEI, TA/PEI and ZIF-8/PEI interlayers, respectively.

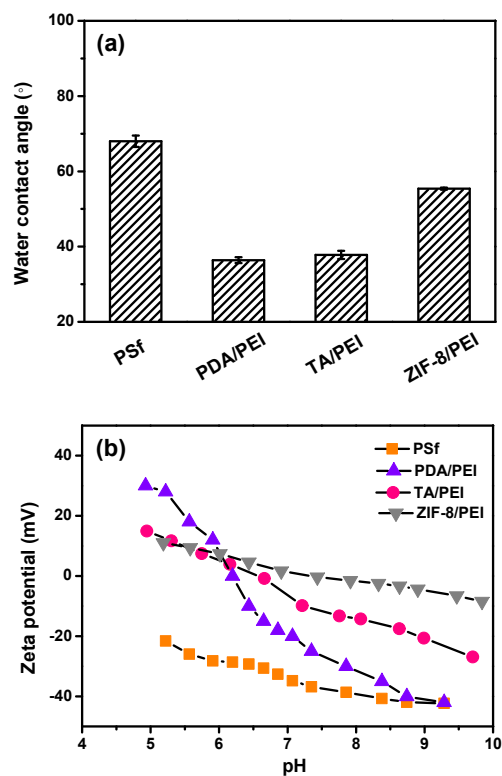

**Figure S3.** (a) Water contact angle and (b) zeta potential of PSf substrate and PSf substrates modified with PDA/PEI, TA/PEI and ZIF-8/PEI interlayers, respectively.

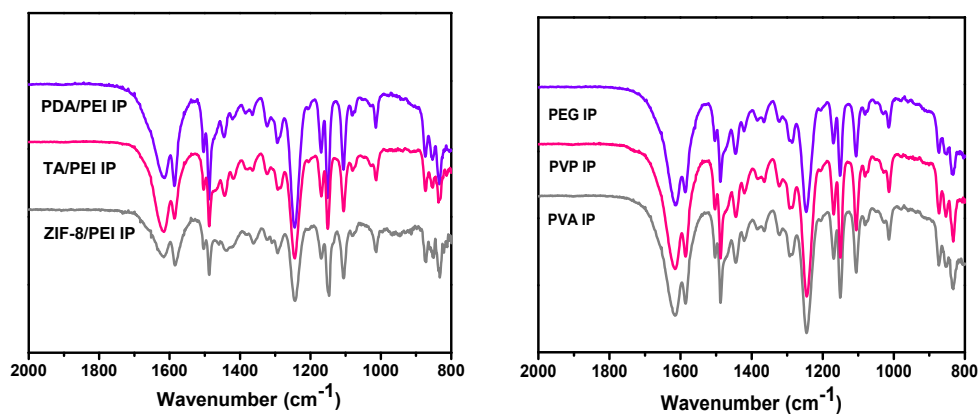

**Figure S4.** ATR/FT-IR spectra of the polyamide-based membranes formed on the substrates modified with the interlayers and/or with the macromolecular additives in the solution of PIP.

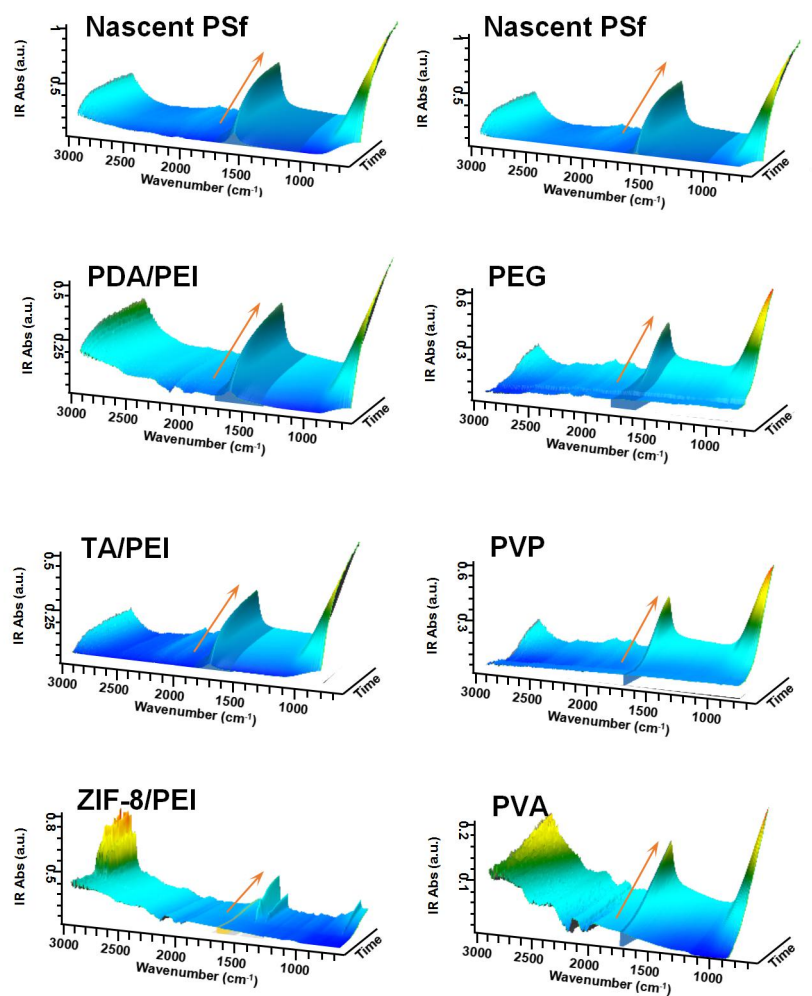

**Figure S5.** Three-dimension spectra measured by in-situ FT-IR spectroscopy for the polyamide formation as a function of interfacial polymerization time, with different modified interlayers and/or macromolecular additives in the solution of PIP.

## UV-vis analysis of diamine diffusivity

The diffusion of diamine monomers were measured by UV-vis absorption spectra, using an ultraviolet spectrophotometer (Shimadzu, UV 2450, Japan). By taking 3 mL hexane solution approximately at the hexane/water interface, diamine concentration and diffusivity were measured by ultraviolet analyses and acyl chloride monomer was not added in the hexane phase. Initial diffusivity  $D_0$  and the corresponding  $D$  are calculated by the following equation (S1):

$$J = \frac{dm}{A dt} = -D_0 \left( \frac{\partial C}{\partial X} \right) \quad (S1)$$

where  $J$  is the diamine diffusive flux,  $dm$ ,  $A$  and  $dt$  are the diamine mass, contact area and diffusion time, respectively.  $D_0$  is the initial diffusivity,  $\partial C$  and  $\partial X$  are the concentration change and diffusion distance (approximately  $\sim 10^{-5}$  cm).

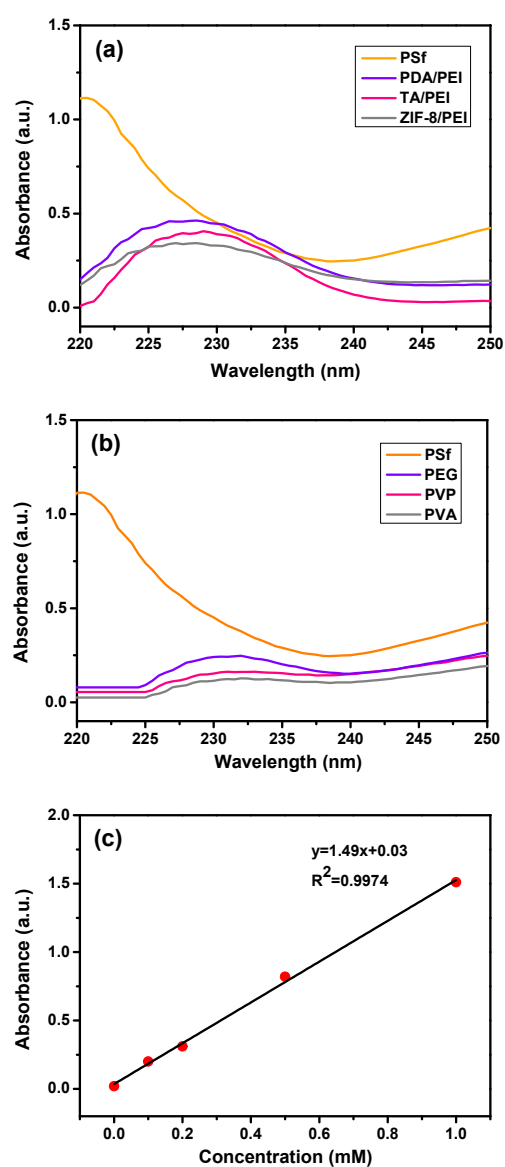

**Figure S6.** UV-vis absorption spectra of diamine monomer diffusion from water to hexane (the organic solution is hexane without acyl chloride monomer) and the calibration stand curve of absorbance *vs.* diamine concentration.

**Table S1.** According to UV-vis adsorption spectra, the concentration and diffusivity of diamine monomers were determined, which were calculated by equation (S1).

|                                                       | PSf   | PDA/PEI | TA/PEI | ZIF-8/PEI | PEG   | PVP   | PVA   |
|-------------------------------------------------------|-------|---------|--------|-----------|-------|-------|-------|
| Absorbance<br>(a.u.)                                  | 1.115 | 0.459   | 0.406  | 0.343     | 0.248 | 0.163 | 0.128 |
| Concentration<br>(mM)                                 | 0.728 | 0.288   | 0.252  | 0.210     | 0.146 | 0.089 | 0.066 |
| Diffusivity<br>( $\times 10^{-6}$ cm <sup>2</sup> /s) | 11.96 | 4.73    | 4.14   | 3.45      | 2.39  | 1.46  | 1.08  |

### Adsorption of the diamine monomers measured by TOC analyzer

The PSf substrate and substrates with the modified interlayers were cut in to square pieces of 1 cm<sup>2</sup> area and immersed in diamine solution for 10 minutes. The equilibrium adsorption amount were obtained after 24 h diamine release in 30 mL DI water and total organic carbon of diamine monomers were quantified by a TOC analyzer (TOC, GE Sievers InnovOx ES, USA).

**Table S2.** Adsorption mass of diamine monomers measured by TOC analyzer.

|           | PSf     | PDA/PEI | TA/PEI  | ZIF-8/PEI | PEG     | PVP     | PVA     |
|-----------|---------|---------|---------|-----------|---------|---------|---------|
| Mass (g)  | 0.00745 | 0.00759 | 0.00768 | 0.00772   | 0.00745 | 0.00745 | 0.00745 |
| PIP (ppm) | 8.78    | 29.9    | 88.6    | 224       | 9.10    | 10.2    | 10.5    |
| Q (mg/g)  | 1.18    | 3.94    | 11.5    | 29.0      | 1.22    | 1.37    | 1.41    |

## Binding energy simulation

Binding energy simulations were performed between the PIP and interlayers and/or with macromolecular additives in the PIP solution. It is conducted in Materials Studio 7.0. Firstly, all the molecules were constructed and then optimized by Forcite module. The binding energy ( $E_b$ ) in the COMPASS force-field of PIP and other molecules were calculated using the equation (S2) [1]:

$$E_b = E_{\text{PIP-molecule}} - (E_{\text{PIP}} + E_{\text{molecule}}) \quad (\text{S2})$$

where  $E_{\text{PIP-molecule}}$  is the system total energy,  $E_{\text{PIP}}$  and  $E_{\text{molecule}}$  are the energies of the PIP and other molecules, respectively. The binding energy is the combination of attractive and repulsive forces between these molecules.

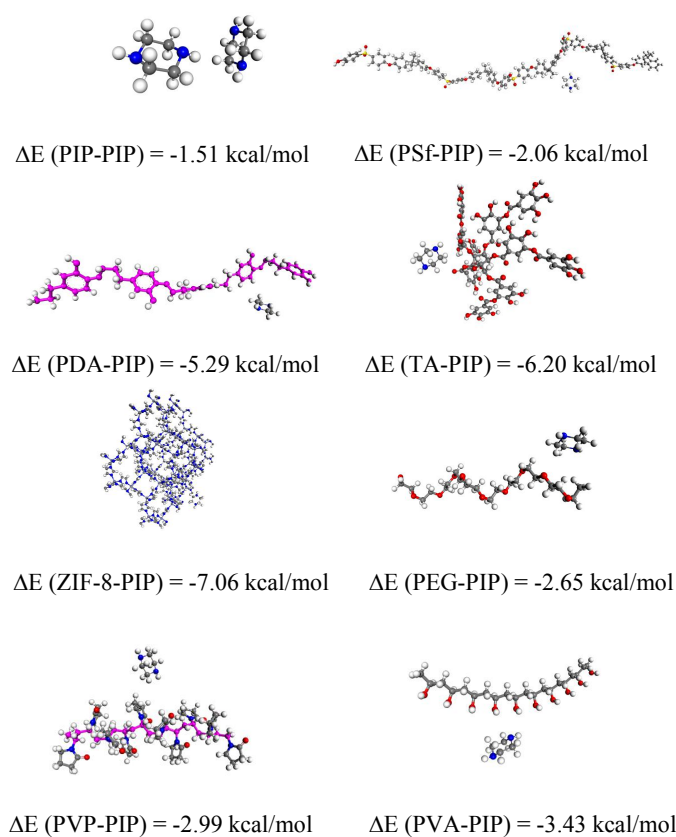

**Figure S7.** Binding energies calculated between PIP and other molecules.



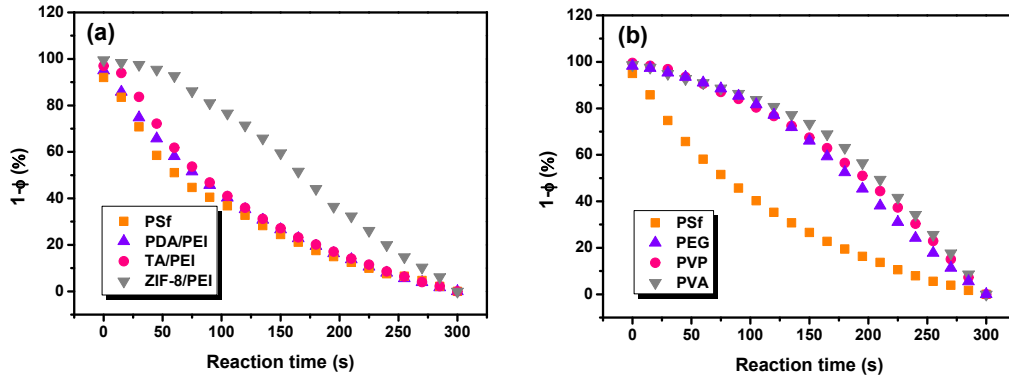

Figure S8. Polyamide volume fractions converted from in-situ FT-IR spectra.

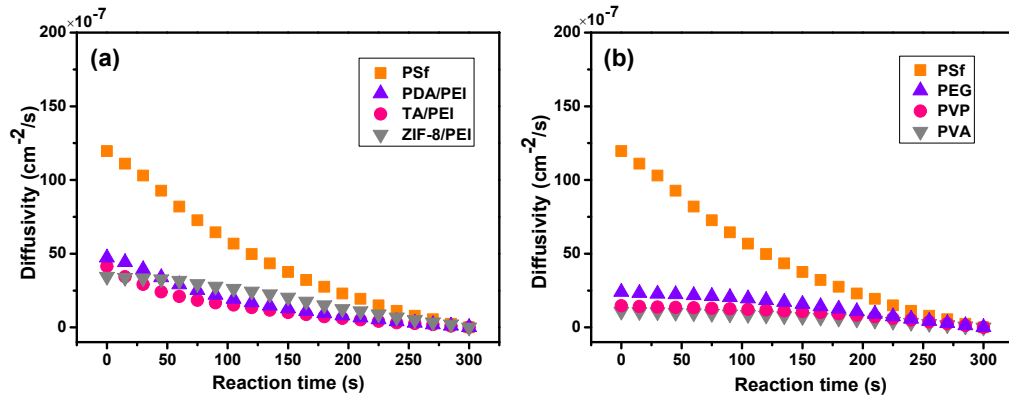

Figure S9. Diamine diffusivity with the interfacial polymerization time, showing depressed and “self-limiting” effect.

$$D = D_0 (1 - \phi)^\alpha \quad (\text{S3})$$

where the corresponding diffusivity  $D$  is calculated from the empirical formula, in which  $D_0$  is the initial diffusivity,  $\phi$  is the polyamide volume fraction and  $\alpha$  typically varies in the range of  $1 < \alpha < 3$  [2].

### Determination of the polyamide layer thickness by FT-IR spectroscopy

Thickness of the polyamide layer was probed by FT-IR with an ATR accessory (Ge crystal, 45° incident angle), using the equations (S4 and S5) [3]:

$$d_p = \frac{\lambda}{2\pi\sqrt{n_1^2 \sin^2 \theta - n_2^2}} \quad (\text{S4})$$

where  $d_p$  is the penetration depth,  $\lambda$  is the wavelength of infrared radiations,  $n_1$  and  $n_2$  are refractive indices of the crystal and the sample. Since  $n_1 = 4.0$  (Ge crystal),  $n_2 = 1.50$  (polyamide sample) and  $\theta = 45^\circ$ ,  $d_p = 0.066 \lambda$ . The characteristic absorbance at  $1640 \text{ cm}^{-1}$  was transformed into the polyamide layer thickness [4]:

$$T = -\ln \left[ \frac{A_b(T)}{A_b(0)} \right] \times \frac{d_p}{2} \quad (\text{S5})$$

where  $T$  is the thickness,  $A_b(T)$  and  $A_b(0)$  are the absorbance of a band at the layer thickness of  $T$  and 0, respectively.

**Table S3.** Polyamide layer thickness acquired from *in-situ* FT-IR spectroscopy, which were fitted mathematically with the equation of  $X = At^b$ .

|   | PSf  | PDA/PEI | TA/PEI | ZIF-8/PEI | PEG | PVP | PVA |
|---|------|---------|--------|-----------|-----|-----|-----|
| A | 24.8 | 7.3     | 4.0    | 0.6       | 5.4 | 3.3 | 0.5 |
| b | 1/2  | 1/2     | 1/2    | 1.0       | 2/3 | 2/3 | 1.0 |

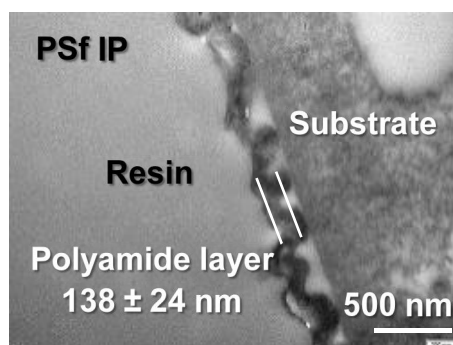

**Figure S10.** TEM observation of polyamide layer thickness formed on the PSf substrate.

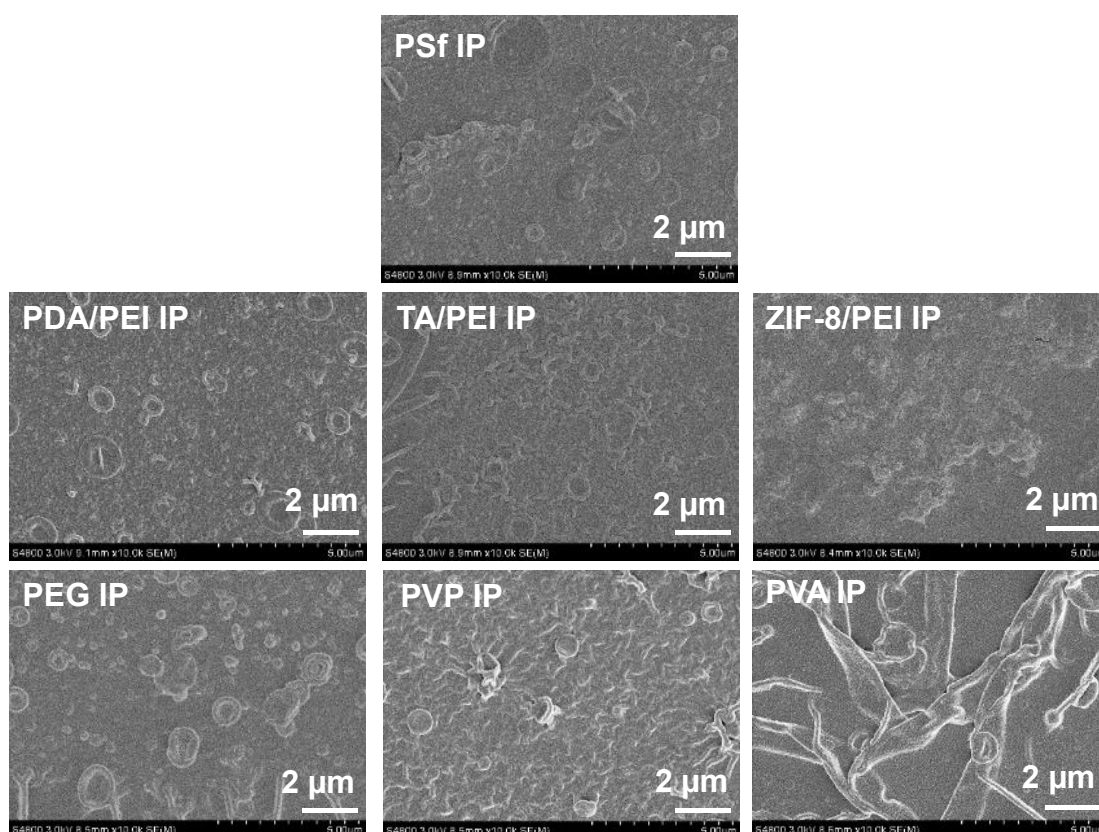

**Figure S11.** FESEM images of surface morphologies of polyamide layers formed on the PSf substrate and PSf substrates modified with interlayers, and/or doped polyamide layer with macromolecular additives in the solution of PIP.

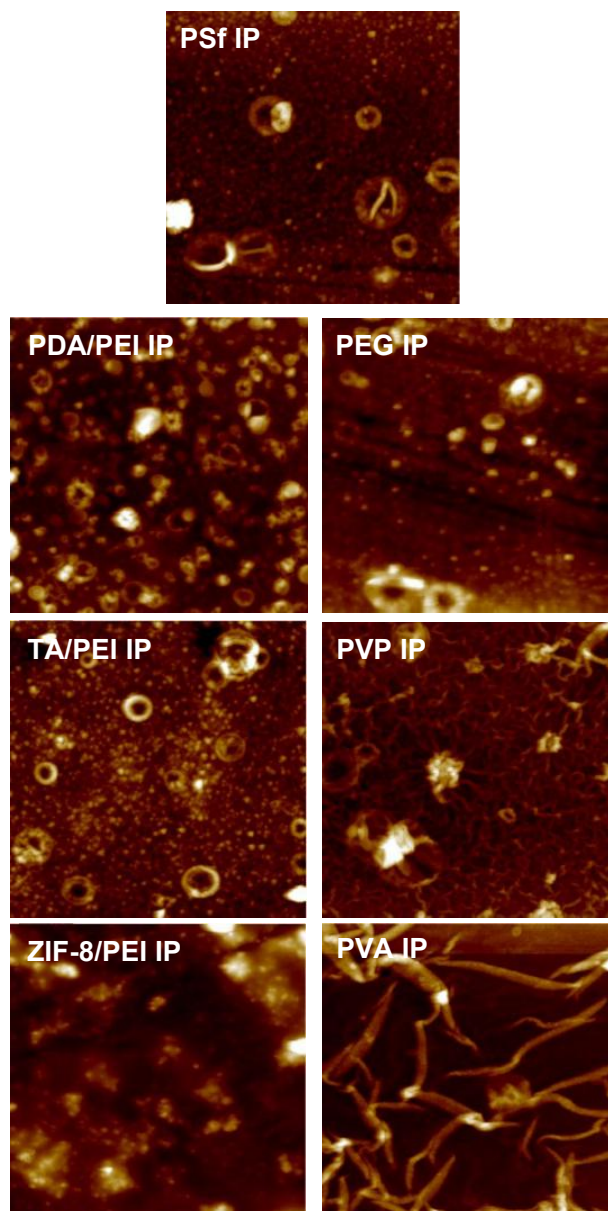

**Figure S12.** AFM images of surface topographies of polyamide layers formed on the PSf substrate and PSf substrates modified with interlayers, and/or doped polyamide layer with macromolecular additives in the solution of PIP.

**Table S4.** Surface roughness of the membrane samples measured from AFM images.

| Membranes    | R <sub>a</sub> (nm) | R <sub>q</sub> (nm) |
|--------------|---------------------|---------------------|
| PSf IP       | 53                  | 79                  |
| PDA/PEI IP   | 52                  | 81                  |
| TA/PEI IP    | 66                  | 84                  |
| ZIF-8/PEI IP | 131                 | 189                 |
| PEG IP       | 54                  | 73                  |
| PVP IP       | 72                  | 103                 |
| PVA IP       | 95                  | 113                 |

**Table S5.** XPS analyses of element component of the polyamide membrane surface and the corresponding calculated O/N ratio.

| Membranes    | C (%) | N (%) | O (%) | O/N  |
|--------------|-------|-------|-------|------|
| PSf IP       | 70.51 | 12.15 | 17.34 | 1.43 |
| PDA/PEI IP   | 67.72 | 10.60 | 21.68 | 2.04 |
| TA/PEI IP    | 67.62 | 10.91 | 21.47 | 1.97 |
| ZIF-8/PEI IP | 68.38 | 11.80 | 19.82 | 1.68 |
| PEG IP       | 69.01 | 11.57 | 19.42 | 1.68 |
| PVP IP       | 68.81 | 12.12 | 19.07 | 1.57 |
| PVA IP       | 69.65 | 13.19 | 17.15 | 1.30 |

**Table S6.** Water contact angle and zeta potential of the formed polyamide membrane.

| Membranes    | Contact angle (°) | Zeta potential (mV) |
|--------------|-------------------|---------------------|
| PSf IP       | 75 ± 4.4          | -38.2               |
| PDA/PEI IP   | 35 ± 3.6          | -16.8               |
| TA/PEI IP    | 43 ± 3.3          | -13.4               |
| ZIF-8/PEI IP | 48 ± 4.2          | -12.6               |
| PEG IP       | 29 ± 3.2          | -32.5               |
| PVP IP       | 28 ± 2.4          | -29.4               |
| PVA IP       | 26 ± 2.8          | -25.6               |

**Table S7.** Rejections of polyamide membrane for different kinds of inorganic salts.

| Membranes                       | R <sub>PDA/PEI</sub> (%) | R <sub>TA/PEI</sub> (%) | R <sub>ZIF-8/PEI</sub> (%) | R <sub>PEG</sub> (%) | R <sub>PVP</sub> (%) | R <sub>PVA</sub> (%) |
|---------------------------------|--------------------------|-------------------------|----------------------------|----------------------|----------------------|----------------------|
| Na <sub>2</sub> SO <sub>4</sub> | 97.5                     | 97.8                    | 98.2                       | 97.4                 | 98.2                 | 98.4                 |
| MgSO <sub>4</sub>               | 97.2                     | 97.6                    | 97.8                       | 97.5                 | 97.8                 | 98.2                 |
| MgCl <sub>2</sub>               | 69.5                     | 70.3                    | 73.4                       | 80.9                 | 85.6                 | 87.3                 |
| CaCl <sub>2</sub>               | 68.1                     | 68.6                    | 69.4                       | 78.4                 | 83.6                 | 85.4                 |
| NaCl                            | 42.5                     | 43.6                    | 45.2                       | 52.8                 | 53.6                 | 54.2                 |

## References

- S1. Zhai, Z.; Jiang, C. Fabrication of advanced nanofiltration membranes with nanostrand hybrid morphology mediated by ultrafast noria–polyethyleneimine codeposition. *J. Mater. Chem. A* **2018**, *6*, 21207–21215.
- S2. Freger, V. Kinetics of film formation by interfacial polycondensation. *Langmuir* **2005**, *21*, 1884–1894.
- S3. Ohta, K.; Iwamoto, R. Experimental proof of the relation between thickness of the probed surface layer and absorbance in FT-IR/ATR spectroscopy. *Appl. Spectrosc.* **1985**, *39*, 418–425.
- S4. Singh, P. S.; Joshi, S. V. Probing the structural variations of thin film composite RO membranes obtained by coating polyamide over polysulfone membranes of different pore dimensions. *J. Memb. Sci.* **2006**, *278*, 19–25.
